# Supplementary material
Source: PubMed Central journal article supplement (PMC3663263)
Supplement: supp_tpc.113.109744_tpc109744Supplemental.pdf [file supp_tpc.113.109744_tpc109744Supplemental.pdf]

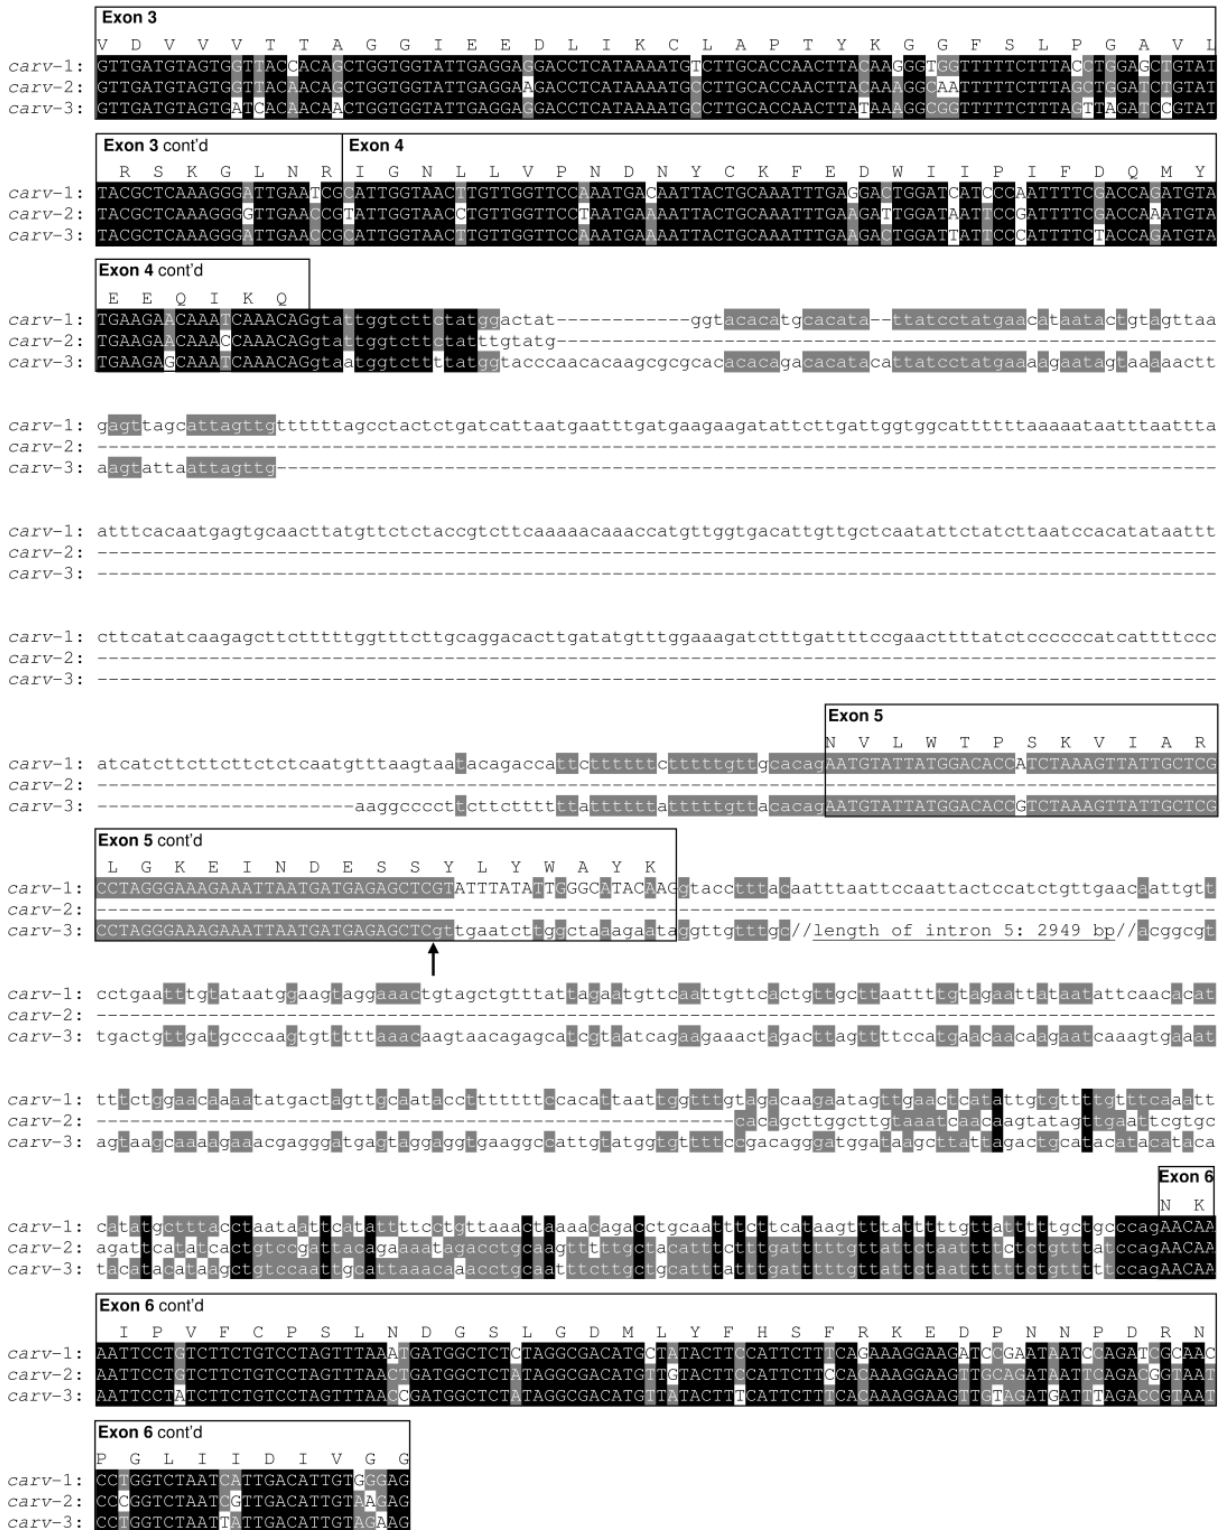

Supplemental Figure 1. Alignment of the genomic sequences with similarity to *dhs* genes identified from *Convolvulus arvensis*. Exons are numbered according to Reimann et al. (2004). *carv-1* is interpreted as functional DHS-coding gene, *carv-2* and *carv-3* are most likely pseudogenes. In the first line the amino acid sequence encoded by the exon sequences of *carv-1* is given. Predicted exon regions are boxed, the respective coding sequences are given in upper case characters. Lower case characters indicate intron sequences. Hyphens indicate sequence gaps. Of intron 5 of *carv-3* with a total length of 2949 bp only 334 bp are shown in this alignment. The putatively modified splicing site within exon5 of *carv-3* is indicated by an arrow.

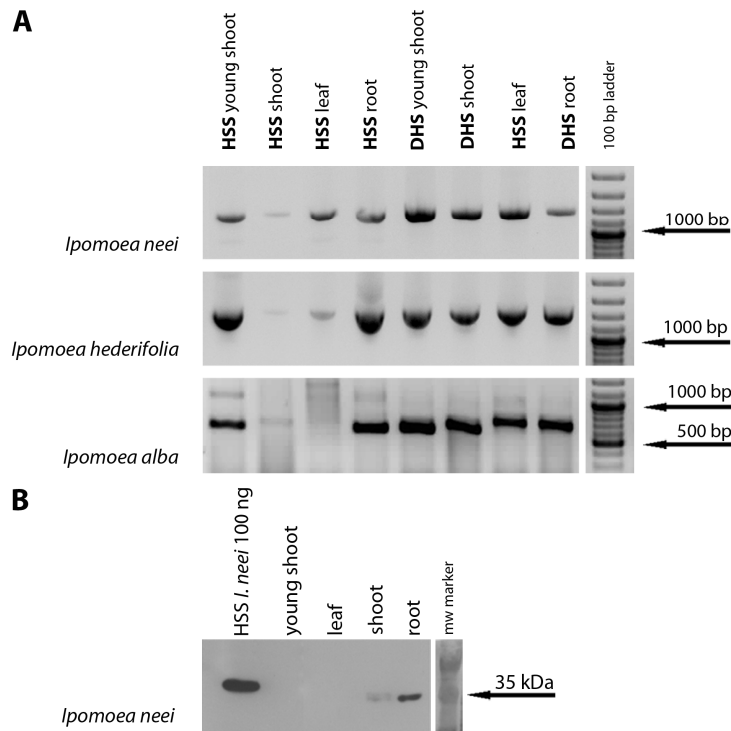

**Supplemental Figure 2. Tissue-specific expression of DHS and HSS in various plant organs. A.** Transcript detection by RT-PCR of the PA-producing species *I. neei*, *I. hederifolia*, and the PA-free species *I. alba*. 1  $\mu$ g total RNA of various plant organs was reverse-transcribed and DHS- and HSS-coding cDNAs were amplified by PCR with gene-specific primers. The expected size of PCR products was 1200 bp for HSS and DHS of *I. hederifolia* and *I. neei* and 600 bp for HSS and DHS of *I. alba*. A 100-bp DNA size marker is shown. **B.** Protein gel-blot analysis for HSS of *I. neei*. 20  $\mu$ g of soluble protein extracted from the same plant organs as used for RT-PCR were separated by SDS-PAGE and blotted onto a polyvinylidene difluoride membrane. HSS was detected with an affinity-purified antibody against HSS of *I. neei*. As a positive control, 100 ng of purified recombinant HSS protein was applied. The recombinant HSS protein contained a 6xHis tag resulting in a slightly increased protein size in comparison with the native HSS. mw marker, molecular weight marker.

**Supplemental Table 1.** Genomic organization of *dhs* and *hss* genes of the Convolvulaceae species *I. neei*, *I. alba*, *I. purpurea*, *C. tricolor*, and *C. arvensis*. Numbering of introns follows the genomic organization of the *dhs* gene from *H. sapiens*. The number, position, length, and phase of the introns are given. Introns 3 and 7 are missing in all Convolvulaceae genes. Pseudogenes *carv-2* and *carv-3* are shaded in gray. Variation of the exon lengths is only observable in exon 1 and 9 (framed in gray).

| Species (gene)                       | E 1           | I 1           | E 2           | I 2  | E 3 | (I 3) | E 4 | I 4 | E 5 | I 5  | E 6 | I 6 | E 7 | (I 7) | E 8           | I 8           | E 9           |
|--------------------------------------|---------------|---------------|---------------|------|-----|-------|-----|-----|-----|------|-----|-----|-----|-------|---------------|---------------|---------------|
| <b>Intron position</b>               |               |               |               |      |     |       |     |     |     |      |     |     |     |       |               |               |               |
| <b>Intron phase</b>                  |               | 0             |               | 0    |     | -     |     | 0   |     | 0    |     | 1   |     | -     |               | 0             |               |
| <i>I. neei</i> ( <i>dhs</i> )        | 219           | 358           | 168           | 588  | 122 | 0     | 97  | 293 | 87  | 176  | 133 | 76  | 110 | 0     | 126           | 117           | 87            |
| <i>I. alba</i> ( <i>dhs</i> )        | 219           | 369           | 168           | 794  | 122 | 0     | 97  | 422 | 87  | 338  | 133 | 78  | 110 | 0     | 126           | 96            | 87            |
| <i>I. purpurea</i> ( <i>dhs</i> )    | <sup>a)</sup> | <sup>a)</sup> | <sup>a)</sup> | 630  | 122 | 0     | 97  | 405 | 87  | 176  | 130 | 80  | 110 | 0     | <sup>a)</sup> | <sup>a)</sup> | <sup>a)</sup> |
| <i>I. purpurea</i> ( <i>dhs</i> )    | 216           | 443           | 168           | 227  | 122 | 0     | 97  | 407 | 87  | 163  | 130 | 79  | 110 | 0     | 126           | 223           | 87            |
| <i>C. tricolor</i> ( <i>dhs</i> )    | <sup>a)</sup> | 105           | 168           | 291  | 122 | 0     | 97  | 340 | 87  | 109  | 133 | 76  | 110 | 0     | 126           | 192           | <sup>a)</sup> |
| <i>C. arvensis</i> ( <i>dhs</i> )    | <sup>a)</sup> | 300           | 168           | 593  | 122 | 0     | 97  | 432 | 87  | 343  | 133 | 85  | 110 | 0     | 126           | 236           | <sup>a)</sup> |
| <i>I. neei</i> ( <i>hss</i> )        | 210           | 2736          | 168           | 538  | 122 | 0     | 97  | 76  | 87  | 943  | 133 | 82  | 110 | 0     | 126           | 118           | 78            |
| <i>I. hederifolia</i> ( <i>hss</i> ) | 210           | 2971          | 168           | 521  | 122 | 0     | 97  | 77  | 87  | 584  | 133 | 82  | 110 | 0     | 126           | 114           | 78            |
| <i>I. alba</i> ( <i>hss</i> )        | 210           | 1164          | 168           | 756  | 122 | 0     | 97  | 78  | 87  | 1158 | 133 | 85  | 110 | 0     | 126           | 121           | 78            |
| <i>C. arvensis</i> ( <i>carv-2</i> ) | <sup>a)</sup> | <sup>a)</sup> | <sup>a)</sup> | 582  | 122 | 0     | 97  | 160 | x   | x    | 133 | 80  | 110 | 0     | 126           | 405           | <sup>a)</sup> |
| <i>C. arvensis</i> ( <i>carv-3</i> ) | 213           | 1319          | 168           | 1001 | 122 | 0     | 97  | 139 | 67  | 2948 | 132 | 80  | 110 | 0     | 126           | 91            | 78            |
| <i>dhs/H. sapiens</i> <sup>b)</sup>  | 207           | 1233          | 165           | 238  | 122 | 80    | 97  | 79  | 87  | 2060 | 106 | 79  | 104 | 965   | 126           | 83            | 96            |

<sup>a)</sup> 5' and 3' ends are missing because of amplification with degenerate primers that bind within the sequence

<sup>b)</sup> GenBank accession number NC\_000019.8

**Supplemental Table 2.** Distances from pairwise comparisons of selected pairs of DHS- and HSS-coding cDNA sequences from the Convolvulaceae.  $d_{aa}$ , amino acid distance;  $d_{na}$ , nucleotide distance. Distances for paralogous sequences are given in bold.

| $d_{aa}$<br>$d_{na}$          | DHS<br><i>I. hederifolia</i> | DHS<br><i>I. meyeri</i> | DHS<br><i>I. alba</i> | DHS<br><i>I. purpurea</i> | DHS<br><i>Merremia</i><br><i>quinquefolia</i> | HSS<br><i>I. neei</i>          | HSS<br><i>I. hederifolia</i>   | HSS<br><i>I. meyeri</i>        | HSS<br><i>I. alba</i>          | HSS<br><i>M. quinquefolia</i>  |
|-------------------------------|------------------------------|-------------------------|-----------------------|---------------------------|-----------------------------------------------|--------------------------------|--------------------------------|--------------------------------|--------------------------------|--------------------------------|
| DHS<br><i>I. neei</i>         | 0.0141<br>0.0226             | 0.0249<br>0.0312        | 0.0248<br>0.0311      | 0.0285<br>0.0287          | 0.0503<br>0.0560                              | <b>0.1409</b><br><b>0.1370</b> |                                |                                |                                |                                |
| DHS<br><i>I. hederifolia</i>  |                              | 0.0177<br>0.0324        | 0.0177<br>0.0312      | 0.0177<br>0.0275          | 0.0357<br>0.0509                              |                                | <b>0.1250</b><br><b>0.1257</b> |                                |                                |                                |
| DHS<br><i>I. meyeri</i>       |                              |                         | 0.0177<br>0.0287      | 0.0285<br>0.0227          | 0.0433<br>0.0510                              |                                |                                | <b>0.1299</b><br><b>0.1492</b> |                                |                                |
| DHS<br><i>I. alba</i>         |                              |                         |                       | 0.0285<br>0.0239          | 0.0321<br>0.0472                              |                                |                                |                                | <b>0.0975</b><br><b>0.1296</b> |                                |
| DHS<br><i>I. purpurea</i>     |                              |                         |                       |                           | 0.0467<br>0.0422                              |                                |                                |                                |                                |                                |
| DHS<br><i>M. quinquefolia</i> |                              |                         |                       |                           |                                               |                                |                                |                                |                                | <b>0.1448</b><br><b>0.1537</b> |
| HSS<br><i>I. neei</i>         |                              |                         |                       |                           |                                               |                                | 0.0141<br>0.0083               | 0.0508<br>0.0487               | 0.0772<br>0.0512               | 0.1249<br>0.1296               |
| HSS<br><i>I. hederifolia</i>  |                              |                         |                       |                           |                                               |                                |                                | 0.0581<br>0.0550               | 0.0772<br>0.0550               | 0.1290<br>0.1338               |
| HSS<br><i>I. meyeri</i>       |                              |                         |                       |                           |                                               |                                |                                |                                | 0.0731<br>0.0642               | 0.1198<br>0.1421               |
| HSS<br><i>I. alba</i>         |                              |                         |                       |                           |                                               |                                |                                |                                |                                | 0.1298<br>0.1439               |

**Supplemental Table 3.** Analyses of codon substitution patterns. Dataset A. The log-likelihood values and parameter estimates for various models of evolution are given. Numbering of the amino acid positions is based on the amino acid sequence of the DHS from *I. hederifolia*, position 1 is defined as the start codon in the open reading frame.

| Model Code                                                | Likelihood (lnL) | ts/tv | Estimates of Parameters                                                                                                                                                                   | Positively selected sites <sup>b)</sup>                                                                                                                               |
|-----------------------------------------------------------|------------------|-------|-------------------------------------------------------------------------------------------------------------------------------------------------------------------------------------------|-----------------------------------------------------------------------------------------------------------------------------------------------------------------------|
| M0 (one ratio)                                            | -3535.17         | 2.443 | $\omega = 0.12284$                                                                                                                                                                        | Not calculated                                                                                                                                                        |
| <b>Site Models</b>                                        |                  |       |                                                                                                                                                                                           |                                                                                                                                                                       |
| M1a (Nearly Neutral)                                      | -3498.75         | 2.604 | $p_0 = 0.887$ ( $p_1 = 0.113$ )<br>$\omega_0 = 0.063$ ( $\omega_1 = 1,000$ )                                                                                                              | Not calculated                                                                                                                                                        |
| M2a (Positive Selection)                                  | -3498.75         | 2.604 | $p_0 = 0.887$ $p_1 = 0.068$ ( $p_2 = 0.044$ )<br>$\omega_0 = 0.063$ ( $\omega_1 = 1,000$ ) $\omega_2 = 1,000$                                                                             | No sites identified                                                                                                                                                   |
| <b>Branch Model</b>                                       | -3525.32         | 2.452 | $\omega_0 = 0.091$ <sup>a)</sup> $\omega_a = 0.202$ <sup>a)</sup> $\omega_B = 0.094$ <sup>a)</sup><br><b><math>\omega_C = 1.919</math></b> <sup>a)</sup> $\omega_D = 0.165$ <sup>a)</sup> | Not calculated                                                                                                                                                        |
| <b>Branch-Site Model A<sup>c)</sup></b>                   |                  |       |                                                                                                                                                                                           |                                                                                                                                                                       |
| Clade a                                                   | -3483.06         | 2.565 | $p_0 = 0.811$ $p_1 = 0.064$<br>$p_2 = 0.126$ (0.11642 + 0.00917)<br>$\omega_0 = 0.044$ ( $\omega_1 = 1.000$ ) $\omega_2 = 1.140$                                                          | E89 D119 T120<br>H128 P159 L175<br>D186 I189 L246<br>D259 P260 P263<br><b>N266</b> I271 <b>I277</b><br><b>N281</b> G288 I295<br>A316 G348 G349<br>No sites identified |
| Branch A                                                  | -3498.75         | 2.604 | $p_0 = 0.887$ $p_1 = 0.113$ , $p_2 = 0.000$ (0.000 + 0.000) $\omega_0 = 0.063$ ( $\omega_1 = 1.000$ ) $\omega_2 = 1.000$                                                                  | No sites identified                                                                                                                                                   |
| Branch B                                                  | -3498.15         | 2.606 | $p_0 = 0.812$ $p_1 = 0.103$ $p_2 = 0.086$ (0.076 + 0.010) $\omega_0 = 0.060$ ( $\omega_1 = 1.000$ ) $\omega_2 = 1.000$                                                                    | V113 P337                                                                                                                                                             |
| Branch C                                                  | -3493.17         | 2.607 | $p_0 = 0.884$ $p_1 = 0.108$ $p_2 = 0.008$ (0.008 + 0.0009) $\omega_0 = 0.062$ ( $\omega_1 = 1.000$ ) <b><math>\omega_2 = 95.074</math></b>                                                | <b>N281</b> G349                                                                                                                                                      |
| Branch D                                                  | -3497.59         | 2.645 | $p_0 = 0.883$ $p_1 = 0.106$ $p_2 = 0.011$ (0.010 + 0.001) $\omega_0 = 0.062$ ( $\omega_1 = 1.000$ ) <b><math>\omega_2 = 22.923</math></b>                                                 | T120 P159 L175                                                                                                                                                        |
| <b>Branch-Site Model A with <math>\omega_2 = 1</math></b> |                  |       |                                                                                                                                                                                           |                                                                                                                                                                       |
| Clade a                                                   | -3483.15         | 2.556 | $p_0 = 0.789$ $p_1 = 0.064$ $p_2 = 0.134$ (0.124 + 0.001) $\omega_0 = 0.043$ ( $\omega_1 = 1.000$ ) ( $\omega_2 = 1.000$ )                                                                | Not calculated                                                                                                                                                        |
| Branch A                                                  | -3498.75         | 2.604 | $p_0 = 0.887$ $p_1 = 0.113$ $p_2 = 0.000$ (0.000 + 0.000) $\omega_0 = 0.063$ ( $\omega_1 = 1.000$ ) ( $\omega_2 = 1.000$ )                                                                | Not calculated                                                                                                                                                        |
| Branch B                                                  | -3498.15         | 2.606 | $p_0 = 0.812$ $p_1 = 0.103$ $p_2 = 0.086$ (0.076 + 0.010) $\omega_0 = 0.060$ ( $\omega_1 = 1.000$ ) ( $\omega_2 = 1.000$ )                                                                | Not calculated                                                                                                                                                        |
| Branch C                                                  | -3495.86         | 2.590 | $p_0 = 0.553$ $p_1 = 0.064$ $p_2 = 0.384$ (0.344 + 0.040) $\omega_0 = 0.062$ ( $\omega_1 = 1.000$ ) ( $\omega_2 = 1.000$ )                                                                | Not calculated                                                                                                                                                        |
| Branch D                                                  | -3497.87         | 2.591 | $p_0 = 0.841$ $p_1 = 0.103$ $p_2 = 0.056$ (0.050 + 0.006) $\omega_0 = 0.059$ ( $\omega_1 = 1.000$ ) ( $\omega_2 = 1.000$ )                                                                | Not calculated                                                                                                                                                        |

<sup>a)</sup> omega ratios were calculated for the branches, labeled in Fig. 3, ( $\omega_a$  branches in the HSS clade,  $\omega_B$  HSS branch B,  $\omega_C$  HSS branch C,  $\omega_D$  HSS branch D)

<sup>b)</sup> Numbering of the amino acid positions is based on the amino acid sequence of the DHS from *I. hederifolia*. Position 1 is defined as the start codon in the open reading frame.

<sup>c)</sup> The models assume four site classes. In site class 0, all lineages are under purifying selection with a small  $\omega$  ratio  $\omega_0$ . In site class 1, all lineages are undergoing weak purifying selection or neutral evolution with  $\omega_1$  close to 1. In site class 2 ( $2a + 2b$ ), a proportion of class-0 and class-1 sites come under positive selection with  $\omega_2 \geq 1$  on the foreground lineages (Yang et al., 2005).

**Supplemental Table 4.** Likelihood Ratio Test (LRT) statistics and *P* values for various tests of positive selection. Dataset A.

| Model                                               | Null model                                 | df <sup>a</sup> | LRT (2ΔlnL) | <i>P</i> values |
|-----------------------------------------------------|--------------------------------------------|-----------------|-------------|-----------------|
| <b>LRT 1, site model</b>                            |                                            |                 |             |                 |
| M2a (Positive Selection)<br>-3498.75                | M1a (Nearly Neutral)<br>-3498.75           | 2               | 0           | -               |
| <b>LRT 2, branch model</b>                          |                                            |                 |             |                 |
| Branch model<br>-3525.32                            | M0<br>-3535.17                             | 4               | 19.7        | 0.0006          |
| <b>LRT 3, branch-site model, positive selection</b> |                                            |                 |             |                 |
| Branch-Site Model A                                 | Branch-Site Model A<br>with $\omega_2 = 1$ |                 |             |                 |
| Clade a<br>-3483.06                                 | -3483.15                                   | 1               | 0.20        | -               |
| Branch A<br>-3498.75                                | -3498.75                                   | 1               | 0           | -               |
| Branch B<br>-3498.15                                | -3498.15                                   | 1               | 0           | -               |
| Branch C<br>-3493.17                                | -3495.86                                   | 1               | 5.38        | 0.0204□         |
| Branch D<br>-3497.59                                | -3497.87                                   | 1               | 0           | -               |
| <b>LRT 4, branch-site model, relaxed selection</b>  |                                            |                 |             |                 |
| Branch-Site Model A<br>with $\omega_2 = 1$          | M1a (Nearly Neutral)                       |                 |             |                 |
| Clade a<br>-3483.15                                 | -3498.75                                   | 2               | 31.2        | 0.0000*         |
| Branch A<br>-3498.75                                | -3498.75                                   | 2               | 0           | -               |
| Branch B<br>-3498.15                                | -3498.75                                   | 2               | 1.2         | 0.5488          |
| Branch C<br>-3495.86                                | -3498.75                                   | 2               | 5.78        | 0.0556          |
| Branch D<br>-3497.87                                | -3498.75                                   | 2               | 1.76        | 0.4148          |

<sup>a)</sup> df = degrees of freedom

\* Significance corrected for multiple hypothesis testing by Bonferroni's method (Anisimova and Yang, 2007)  $P \leq 0.01$

□ Significance corrected for multiple hypothesis testing by B-Y method (Narum, 2006, Benjamini and Yekutieli, 2001)  $P \leq 0.02190$

**Supplemental Table 5.** Analyses of codon substitution patterns. Dataset B. The log-likelihood values and parameter estimates for various models of evolution are given. Numbering of the amino acid positions is based on the amino acid sequence of the DHS from *I. hederifolia*: position 1 is defined as the start codon in the open reading frame.

| Model Code                                                | Likelihood (lnL) | ts/tv | Estimates of Parameters                                                                                                                                                   | Positively selected sites <sup>b)</sup>                                                                                                     |
|-----------------------------------------------------------|------------------|-------|---------------------------------------------------------------------------------------------------------------------------------------------------------------------------|---------------------------------------------------------------------------------------------------------------------------------------------|
| M0 (one ratio)                                            | -3022.60         | 2.806 | $\omega = 0.134$                                                                                                                                                          | Not calculated                                                                                                                              |
| <b>Site Models</b>                                        |                  |       |                                                                                                                                                                           |                                                                                                                                             |
| M1a (Nearly Neutral)                                      | -2988.26         | 2.890 | $p_0 = 0.902$ ( $p_1 = 0.098$ )<br>$\omega_0 = 0.077$ ( $\omega_1 = 1,000$ )                                                                                              | Not calculated                                                                                                                              |
| M2a (Positive Selection)                                  | -2988.26         | 2.890 | $p_0 = 0.902$ $p_1 = 0.041$ ( $p_2 = 0.057$ )<br>$\omega_0 = 0.063$ ( $\omega_1 = 1,000$ ) $\omega_2 = 1,000$                                                             | No sites identified                                                                                                                         |
| Branch Models                                             | -3003.18         | 2.803 | $\omega_0 = 0.074$ <sup>a)</sup> $\omega_a = 0.210$ <sup>a)</sup> $\omega_B = 0.057$ <sup>a)</sup><br>$\omega_C = 999.000$ <sup>a)</sup> $\omega_D = 0.433$ <sup>a)</sup> | Not calculated                                                                                                                              |
| <b>Branch-Site Model A</b>                                |                  |       |                                                                                                                                                                           |                                                                                                                                             |
| Clade a                                                   | -2974.31         | 2.845 | $p_0 = 0.821$ $p_1 = 0.034$<br>$p_2 = 0.146$ (0.140 + 0.006)<br>$\omega_0 = 0.057$ ( $\omega_1 = 1.000$ ) $\omega_2 = 1.000$                                              | H157 P188 L204<br>D215 I218 L246<br>D259 P260 P263<br>I271 G275 <b>I277</b><br><b>N281</b> G288 S289<br>I295 A316 G348<br>G349<br>V154 A190 |
| Branch A                                                  | -2988.26         | 2.890 | $p_0 = 0.902$ $p_1 = 0.098$ , $p_2 = 0.000$ (0.000 + 0.000) $\omega_0 = 0.077$ ( $\omega_1 = 1.000$ ) $\omega_2 = 1.000$                                                  | V113 P337                                                                                                                                   |
| Branch B                                                  | -2988.26         | 2.890 | $p_0 = 0.902$ $p_1 = 0.098$ , $p_2 = 0.000$ (0.000 + 0.000) $\omega_0 = 0.077$ ( $\omega_1 = 1.000$ ) $\omega_2 = 1.000$                                                  |                                                                                                                                             |
| Branch C                                                  | -2978.59         | 2.863 | $p_0 = 0.837$ $p_1 = 0.075$ $p_2 = 0.087$ (0.080 + 0.007) $\omega_0 = 0.075$ ( $\omega_1 = 1.000$ ) $\omega_2 = 999.000$                                                  | D148 <b>N266</b> <b>I277</b><br><b>N281</b> G421                                                                                            |
| Clade c                                                   | -2984.50         | 2.884 | $p_0 = 0.856$ $p_1 = 0.083$ $p_2 = 0.061$ (0.056 + 0.005) $\omega_0 = 0.072$ ( $\omega_1 = 1.000$ ) $\omega_2 = 2.269$                                                    |                                                                                                                                             |
| Branch D                                                  | -2988.26         | 2.890 | $p_0 = 0.902$ $p_1 = 0.098$ $p_2 = 0.000$ (0.000 + 0.000) $\omega_0 = 0.077$ ( $\omega_1 = 1.000$ ) $\omega_2 = 1.000$                                                    | No sites detected                                                                                                                           |
| Branch E                                                  | -2986.92         | 2.952 | $p_0 = 0.891$ $p_1 = 0.094$ $p_2 = 0.014$ (0.013 + 0.001) $\omega_0 = 0.076$ ( $\omega_1 = 1.000$ ) $\omega_2 = 67.746$                                                   | T149 L204                                                                                                                                   |
| Branch P                                                  | -2988.26         | 2.890 | $p_0 = 0.902$ $p_1 = 0.098$ $p_2 = 0.000$ (0.000 + 0.000) $\omega_0 = 0.077$ ( $\omega_1 = 1.000$ ) $\omega_2 = 1.000$                                                    |                                                                                                                                             |
| Clade p                                                   | -2985.62         | 2.905 | $p_0 = 0.814$ $p_1 = 0.089$ $p_2 = 0.097$ (0.087 + 0.010) $\omega_0 = 0.067$ ( $\omega_1 = 1.000$ ) $\omega_2 = 1.000$                                                    |                                                                                                                                             |
| <b>Branch-Site Model A with <math>\omega_2 = 1</math></b> |                  |       |                                                                                                                                                                           |                                                                                                                                             |
| Clade a                                                   | -2974.31         | 2.885 | $p_0 = 0.821$ $p_1 = 0.034$ $p_2 = 0.146$ (0.140 + 0.006) $\omega_0 = 0.043$ ( $\omega_1 = 1.000$ ) ( $\omega_2 = 1.000$ )                                                | Not calculated                                                                                                                              |
| Branch A                                                  | -2988.26         | 2.890 | $p_0 = 0.902$ $p_1 = 0.098$ , $p_2 = 0.000$ (0.000 + 0.000) $\omega_0 = 0.077$ ( $\omega_1 = 1.000$ ) $\omega_2 = 1.000$                                                  | Not calculated                                                                                                                              |
| Branch B                                                  | -2988.26         | 2.890 | $p_0 = 0.902$ $p_1 = 0.098$ , $p_2 = 0.000$ (0.000 + 0.000) $\omega_0 = 0.077$ ( $\omega_1 = 1.000$ ) $\omega_2 = 1.000$                                                  | Not calculated                                                                                                                              |
| Branch C                                                  | -2981.73         | 2.847 | $p_0 = 0.000$ $p_1 = 0.000$ $p_2 = 0.384$ (0.918 + 0.082) $\omega_0 = 0.075$ ( $\omega_1 = 1.000$ ) ( $\omega_2 = 1.000$ )                                                | Not calculated                                                                                                                              |
| Clade c                                                   | -2984.95         | 2.845 | $p_0 = 0.821$ $p_1 = 0.034$ $p_2 = 0.145$ (0.140 + 0.006) $\omega_0 = 0.057$ ( $\omega_1 = 1.000$ ) ( $\omega_2 = 1.000$ )                                                |                                                                                                                                             |

|          |          |       |                                                                                                                             |                   |
|----------|----------|-------|-----------------------------------------------------------------------------------------------------------------------------|-------------------|
| Branch D | -2988.26 | 2.890 | $p_0 = 0.902$ $p_1 = 0.098$ $p_2 = 0.000$ (0.000 + 0.000) $\omega_0 = 0.077$ ( $\omega_1 = 1.000$ ) ( $\omega_2 = 1.000$ )  | No sites detected |
| Branch E | -2987.58 | 2.880 | $p_0 = 0.856$ $p_1 = 0.090$ $p_2 = 0.054$ (0.0490 + 0.005) $\omega_0 = 0.073$ ( $\omega_1 = 1.000$ ) ( $\omega_2 = 1.000$ ) | Not calculated    |
| Branch P | -2988.26 | 2.890 | $p_0 = 0.902$ $p_1 = 0.098$ $p_2 = 0.000$ (0.000 + 0.000) $\omega_0 = 0.077$ ( $\omega_1 = 1.000$ ) ( $\omega_2 = 1.000$ )  |                   |
| Clade p  | -2985.62 | 2.905 | $p_0 = 0.814$ $p_1 = 0.089$ $p_2 = 0.097$ (0.087 + 0.010) $\omega_0 = 0.067$ ( $\omega_1 = 1.000$ ) ( $\omega_2 = 1.000$ )  |                   |

<sup>a)</sup> omega ratios were calculated for the branches, labeled in Fig. 3, ( $\omega_a$  branches in the HSS clade,  $\omega_B$  HSS branch B,  $\omega_C$  HSS branch C,  $\omega_D$  HSS branch D)

<sup>b)</sup> Numbering of the amino acid positions is based on the amino acid sequence of the DHS from *I. hederifolia*. Position 1 is defined as the start codon in the open reading frame.



**Supplemental Table 6.** Likelihood Ratio Test (LRT) statistics and *P* values for various tests of positive selection. Dataset B.

| Model                                               | Null model                                 | df <sup>a)</sup> | LRT (2ΔlnL) | <i>P</i> values |
|-----------------------------------------------------|--------------------------------------------|------------------|-------------|-----------------|
| <b>LRT 1, site model</b>                            |                                            |                  |             |                 |
| M2a (Positive Selection)<br>-2988.26                | M1a (Nearly Neutral)<br>-2988.26           | 2                | 0           | -               |
| <b>LRT 2, branch model</b>                          |                                            |                  |             |                 |
| Branch model<br>-3003.18                            | M0<br>-3022.60                             | 4                | 38.84       | 0.0000          |
| <b>LRT 3, branch-site model, positive selection</b> |                                            |                  |             |                 |
| Branch-Site Model A                                 | Branch-Site Model A<br>with $\omega_2 = 1$ |                  |             |                 |
| Clade a<br>-2974.31                                 | -2974.31                                   | 1                | 0           | -               |
| Branch A<br>-2988.26                                | -2988.26                                   | 1                | 0           | -               |
| Branch B<br>-2988.26                                | -2988.26                                   | 1                | 0           | -               |
| Branch C<br>-2978.59                                | -2981.73                                   | 1                | 6.28        | 0.0122□         |
| Clade c<br>-2984.50                                 | -2984.95                                   | 1                | 0.9         | 0.3428          |
| Branch D<br>-2988.26                                | -2988.26                                   | 1                | 0           | -               |
| Branch E<br>-2986.92                                | -2987.58                                   | 1                | 1.32        | 0.2506          |
| Branch P<br>-2988.26                                | -2988.26                                   | 1                | 0           | -               |
| Clade p<br>-2985.62                                 | -2985.62                                   | 1                | 0           | -               |
| <b>LRT 4 Branch-site model, relaxed selection</b>   |                                            |                  |             |                 |
| Branch-Site Model A<br>with $\omega_2 = 1$          | M1a (Nearly Neutral)                       |                  |             |                 |
| Clade a<br>-2974.31                                 | -2988.26                                   | 2                | 27.9        | 0.0000* □       |
| Branch A<br>-2988.26                                | -2988.26                                   | 2                | 0           | -               |
| Branch B<br>-2988.26                                | -2988.26                                   | 2                | 0           | -               |
| Branch C<br>-2981.73                                | -2988.26                                   | 2                | 13.1        | 0.0014* □       |
| Clade c<br>-2984.95                                 | -2988.26                                   | 2                | 6.62        | 0.0365          |
| Branch D<br>-2988.26                                | -2988.26                                   | 2                | 0           | -               |
| Branch E<br>-2987.58                                | -2988.26                                   | 2                | 1.4         | 0.4966          |
| Branch P<br>-2988.26                                | -2988.26                                   | 2                | 0           | -               |
| Clade p<br>-2985.62                                 | -2988.26                                   | 2                | 5.3         | 0.0707          |

<sup>a)</sup> df = degrees of freedom

\* significance corrected for multiple hypothesis testing by Bonferroni's method (Anisimova and Yang, 2007)  $P \leq 0.0056$

□ significance corrected for multiple hypothesis testing by B-Y method (Narum, 2006, Benjamini and Yekutieli, 2001)  $P \leq 0.01767$

**Supplemental Table 7.** Nucleotide sequence of primers. For degenerate primers P1-P4, the IUPAC code is used: D = A + G + T; H = A + T + C, K = G + T, M = A + C, N = A + T + C + G, R = A + G, S = C + G, W = A + T and Y = C + T, I = Inosin

| Primer | Sequence                                                        | Properties and Purpose                                                                                                                                                   |
|--------|-----------------------------------------------------------------|--------------------------------------------------------------------------------------------------------------------------------------------------------------------------|
| P1     | 5'-dGTC GAC TCG AGA ATT C(T) <sub>17</sub> -3'                  | oligo(dT) primer                                                                                                                                                         |
| P2     | 5'-TTH YTD GGI TTY ACD TCI AAY CT-3'                            | degenerate primer                                                                                                                                                        |
| P3     | 5'-ATY TTI CCC CAN GAI AYN GCY TC-3'                            | degenerate primer                                                                                                                                                        |
| P4     | 5'-GGA AAG AAA TTA ATG ATG AAA GCT CGT ATT TA-3'                | 3'RACE DHS <i>I. neei</i>                                                                                                                                                |
| P5     | 5'-GCG ATT TTT CGT TAC CAG GTT CTA TGC-3'                       | 3'RACE HSS <i>I. neei</i><br><i>hss</i> gene of <i>I. neei</i>                                                                                                           |
| P6     | 5'-CCT GGA GCT GCA TTA CGC TCA AAG-3'                           | 3'RACE DHS <i>M. quinquifolia</i>                                                                                                                                        |
| P7     | 5'-TTC CTT GAA GGG ATC TGT ACT GCG CTC-3'                       | 3'RACE HSS <i>M. quinquifolia</i>                                                                                                                                        |
| P8     | 5'-TCT GCA CCA TTG CGC ATC AT-3'                                | 5'RACE HSS <i>I. neei</i> (GSP1)                                                                                                                                         |
| P9     | 5'-AAG CGC TCC GGT CTT CCT AGG ACT G-3'                         | 5'RACE HSS <i>I. neei</i> (GSP2)                                                                                                                                         |
| P10    | 5'-CTA CAA TGT CAA TGA TTA GAC CAG GAT GA-3'                    | 5'RACE HSS <i>I. neei</i> (GSP3)                                                                                                                                         |
| P11    | 5'-CCA TTG CGC ATC ATA TT-3'                                    | 5'RACE DHS and HSS <i>M. quinquifolia</i> (GSP1)                                                                                                                         |
| P12    | 5'-GAC GGT CTG GAT TAT CTC CAG CTT CCT-3'                       | 5'RACE DHS <i>M. quinquifolia</i> (GSP2)                                                                                                                                 |
| P13    | 5'-CCA TTC TTG TGT GCC CAG TAT AAG TAC G-3'                     | 5'RACE DHS <i>M. quinquifolia</i> (GSP3)                                                                                                                                 |
| P14    | 5'-CCA GGG TAA CGA TCT GGA TTA TTT GGA TC-3'                    | 5'RACE HSS <i>M. quinquifolia</i> (GSP2)                                                                                                                                 |
| P15    | 5'-GGG CAG AAG ACA GGA ATT TTG TTC TTG TAT GC-3'                | 5'RACE HSS <i>M. quinquifolia</i> (GSP3)                                                                                                                                 |
| P16    | 5'-ATA TAC ATA TGG GAG AAG ATA CCA GAG ATC-3'                   | expression DHS of <i>I. neei</i> , <i>I. meyeri</i> ( <i>Nde</i> I); <i>dhs</i> gene of <i>I. alba</i> , <i>I. purpurea</i> , <i>C. arvensis</i>                         |
| P17    | 5'-ATA TAC TCG AGT TGA TTG CCT GTG GAA TTT TTA-3'               | expression DHS of <i>I. neei</i> , <i>I. meyeri</i> ( <i>Xho</i> I); <i>dhs</i> gene of <i>I. alba</i> , <i>I. purpurea</i> , <i>C. arvensis</i>                         |
| P18    | 5'-TAT ACA TAT GGG GGA AGC CAT TAA AGA TGA GAA T-3'             | expression HSS of <i>I. neei</i> , <i>I. meyeri</i> , <i>I. alba</i> , and <i>I. hederifolia</i> ( <i>Nde</i> I); <i>hss</i> gene of <i>C. arvensis</i> , <i>I. neei</i> |
| P19    | 5'-ATA CTC GAG ATG AAA TTT TAT AGC TTT AGT TGC AAA TGT C-3'     | expression HSS of <i>I. neei</i> , <i>I. meyeri</i> , <i>I. alba</i> , and <i>I. hederifolia</i> ( <i>Xho</i> I); <i>hss</i> gene of <i>C. arvensis</i> , <i>I. neei</i> |
| P20    | 5'-TAT ACA TAT GGG AGA AGC CAC GAG AGA TCA GAA C-3'             | expression DHS of <i>M. quinquifolia</i> ( <i>Nde</i> I)                                                                                                                 |
| P21    | 5'-TAT ACT CGA GTA GAG TGT CGG TGG ATT TTT TAG CTA TAG TTG C-3' | expression DHS of <i>M. quinquifolia</i> ( <i>Xho</i> I)                                                                                                                 |
| P22    | 5'-TAT ACA TAT GGG AGA AGT CTT CAA TGG CGC T-3'                 | expression HSS of <i>M. quinquifolia</i> ( <i>Nde</i> I)                                                                                                                 |
| P23    | 5'-TAT ACT CGA GGT GCC TTT TAT TAG CCT TAG CTG C-3'             | expression HSS of <i>M. quinquifolia</i> ( <i>Xho</i> I)                                                                                                                 |
| P24    | 5'-GGC RAA GCC ATC MAA ATT GTT AAY G-3'                         | degenerate primer                                                                                                                                                        |
| P25    | 5'-CAA AAT CTT YTT RGG STT CAC RTC MAA CC-3'                    | degenerate primer                                                                                                                                                        |

|     |                                                             |                                                                                           |
|-----|-------------------------------------------------------------|-------------------------------------------------------------------------------------------|
| P26 | 5'-CRC CAT TKC GCA TCA TAT TSG-3'                           | degenerate primer                                                                         |
| P27 | 5'-AKD GGR AAW GCA ATK GTT GCA TCA C-3'                     | degenerate primer                                                                         |
| P28 | 5'-GGG ACA TTA CCT TAT GAT GTG TTT TCT CTT-3'               | <i>hss</i> gene of <i>I. neei</i> by inverse PCR                                          |
| P29 | 5'-AGT GTG TTG TGT GCC ATA GAA GAC CAT TA-3'                | <i>hss</i> gene of <i>I. neei</i> by inverse PCR                                          |
| P30 | 5'-TAA CTC TAT ATG TAT TCA CAT TGT TCA AAT TTA-3'           | <i>hss</i> gene of <i>I. neei</i>                                                         |
| P31 | 5'-CCA AAT AAT CCA GAC CAC CAC CCT GGT CTA ATC ATT G-3'     | site-specific mutagenesis of DHS of <i>I. neei</i> (mutation N266H)<br>forward            |
| P32 | 5'-CAA TGA TTA GAC CAG GGT GGT GGT CTG GAT TAT TTG G        | site-specific mutagenesis of DHS of <i>I. neei</i> (mutation N266H)<br>reverse            |
| P33 | 5'-GAT ATT GTG GGA GAT GTC AGG GCC ATG GAT GGT GAG GCT G-3' | site-specific mutagenesis of DHS of <i>I. neei</i> (mutations I277V<br>and N281D) forward |
| P34 | 5'-CAG CCT CAC CAT CCA TGG CCC TGA CAT CTC CCA CAA TAT C-3' | site-specific mutagenesis of DHS of <i>I. neei</i> (mutations I277V<br>and N281D) reverse |
| P35 | 5'-TTT TCT TTA CCT GGA GCT GTA TTA CGC-3'                   | RT-PCR <i>I. alba</i> DHS                                                                 |
| P36 | 5'-CCT TCA CTG TTT TTG CTC CAC CAC G-3'                     | RT-PCR <i>I. alba</i> DHS                                                                 |
| P37 | 5'-TCG TTA CCA GGC TCT ATG CTA CGC-3'                       | RT-PCR <i>I. alba</i> HSS                                                                 |
| P38 | 5'-CTT CAC AGC TTT CGC ICC ATT GCG-3'                       | RT-PCR <i>I. alba</i> HSS                                                                 |

---

**Supplemental Table 8.** Amplification strategy of DHS- and HSS-coding cDNAs and genes, the length of the identified open reading frame (ORF), the 3'- and 5'-untranslated regions (UTRs), and the accession numbers of sequences identified in this project and taken from the databases. --, not determined

| <b>A. cDNA</b>                   | Organ for RNA isolation | Degenerate Primer | RACE Primer (3' and 5' RACE) | ORF Primer | length of ORF [bp]         | 5'UTR [bp] | 3'UTR [bp] | accession numbers |
|----------------------------------|-------------------------|-------------------|------------------------------|------------|----------------------------|------------|------------|-------------------|
| DHS <i>I. neei</i>               | Shoot                   | P2/P3             | P4                           | P16/P17    | 1149 bp                    | --         | 260        | HF911515          |
| HSS <i>I. neei</i>               | Shoot                   | P2/P3             | P5, P8-P10                   | P18/P19    | 1131 bp                    | 80         | 283        | HF911516          |
| DHS <i>M. quinquefolia</i>       | Seedling                | P2/P3             | P6, P11-P13                  | P20/P21    | 1143 bp                    | 120        | 308        | HF911517          |
| HSS <i>M. quinquefolia</i>       | Seedling                | P2/P3             | P7, P11, P14, P15            | P22/P23    | 1122 bp                    | 43         | 133        | HF911518          |
| DHS <i>I. meyeri</i>             | Leaf                    | -                 | -                            | P16/P17    | 1149 bp                    | --         | --         | HF911519          |
| HSS <i>I. meyeri</i>             | Leaf                    | -                 | -                            | P18/P19    | 1131 bp                    | --         | --         | HF911520          |
| DHS <i>I. hederifolia</i>        | Shoot                   | -                 | -                            | P16/P17    | 1149 bp                    | --         | --         | AJ704845          |
| HSS <i>I. hederifolia</i>        | Root                    | -                 | -                            | P18/P19    | 1131 bp                    | --         | --         | HF911521          |
| DHS <i>I. alba</i>               | Shoot                   | -                 | -                            | P16/P17    | 1155 bp                    | --         | --         | HF911522          |
| HSS <i>I. alba</i>               | Shoot                   | -                 | -                            | P18/P19    | 1131 bp                    | --         | --         | HF911523          |
| <b>B. Gene</b>                   | -                       | Degenerate Primer | Additional Primer            | ORF Primer | length of genomic fragment |            |            |                   |
| <i>dhs I. neei</i>               |                         |                   |                              | P16/P17    | 2757 bp                    |            |            | HF911504          |
| <i>hss I. neei</i> <sup>a)</sup> |                         |                   | P5, P28-P30                  | P18/P19    | 5625 bp                    |            |            | HF911505          |
| <i>hss I. hederifolia</i>        |                         |                   |                              | P18/P19    | 5476 bp                    |            |            | HF911506          |
| <i>dhs I. alba (ialb-1)</i>      |                         |                   |                              | P16/P17    | 3072 bp                    |            |            | HF911507          |
| <i>hss I. alba (ialb-2)</i>      |                         |                   |                              | P18/P19    | 4492 bp                    |            |            | HF911508          |
| <i>dhs I. purpurea (ipurp-1)</i> |                         | P25/P26           |                              |            | 1919 bp                    |            |            | HF911509          |
| <i>dhs I. purpurea (ipurp-2)</i> |                         |                   |                              | P16/P17    | 2736 bp                    |            |            | HF911510          |
| <i>dhs C. arvensis (carv-1)</i>  |                         | P24/P27           |                              |            | 2894 bp                    |            |            | HF911512          |
| <i>hss C. arvensis (carv-2)</i>  |                         | P25/P27           |                              |            | 1639 bp                    |            |            | HF911513          |
| <i>hss C. arvensis (carv-3)</i>  |                         |                   |                              | P18/P19    | 6691 bp                    |            |            | HF911514          |
| <i>dhs C. tricolor (ctri-1)</i>  |                         | P24/P27           |                              |            | 2018 bp                    |            |            | HF911511          |

| C. cDNA sequences taken from the database | cited in                   |            |
|-------------------------------------------|----------------------------|------------|
| DHS <i>Heliotropium indicum</i>           | (Reimann et al., 2004)     | AJ704844   |
| HSS <i>Heliotropium indicum</i>           | (Reimann et al., 2004)     | AJ704843   |
| DHS <i>Symphytum officinale</i>           | (Reimann et al., 2004)     | AJ704852   |
| HSS <i>Symphytum officinale</i>           | (Reimann et al., 2004)     | AJ704851   |
| DHS <i>Cynoglossum officinale</i>         | (Reimann et al., 2004)     | AJ704839   |
| HSS <i>Cynoglossum officinale</i>         | (Reimann et al., 2004)     | AJ704840   |
| DHS <i>Nicotiana tabacum</i>              | (Ober and Hartmann, 1999b) | AJ242017   |
| DHS <i>Solanum lycopersicum</i>           |                            | AF296077_1 |
| DHS <i>Crotalaria retusa</i>              | (Reimann et al., 2004)     | AJ704838   |
| HSS <i>Phalaenopsis</i> sp.               | (Reimann et al., 2004)     | AJ704848   |
| DHS <i>Eupatorium cannabinum</i>          | (Reimann et al., 2004)     | AJ704841   |
| HSS <i>Eupatorium cannabinum</i>          | (Reimann et al., 2004)     | AJ704842   |
| DHS <i>Petasites hybridus</i>             | (Reimann et al., 2004)     | AJ704846   |
| HSS <i>Petasites hybridus</i>             | (Reimann et al., 2004)     | AJ704847   |
| DHS <i>Senecio vernalis</i>               | (Ober and Hartmann, 1999a) | AJ238622   |
| HSS <i>Senecio vernalis</i>               | (Ober and Hartmann, 1999a) | AJ238623   |
| DHS <i>Arabidopsis thaliana</i>           |                            | NP_196211  |
| DHS <i>Zea mays</i>                       | (Nurhayati et al., 2009)   | AM411617   |
| DHS <i>Musa acuminata</i>                 | (Wang et al., 2001)        | AF296079_1 |

<sup>a)</sup> hss gene of *I. neei* was amplified via three PCRs: P18/P30, P28/P29 (inverse PCR) P5/P19

**Supplemental Table 9.** Species studied in this project with year and country of collection.

| Species<br>Location (year) of seed collection                                            | References                                  |
|------------------------------------------------------------------------------------------|---------------------------------------------|
| <i>Convolvulus arvensis</i> L.                                                           | Seed collection Botanical Garden Kiel       |
| <i>Convolvulus tricolor</i> L.                                                           | Seed collection Botanical Garden Kiel       |
| <i>Ipomoea hederifolia</i> L.<br>Ella, Sri Lanka (1985)                                  | (Jenett-Siems et al., 1993, 1998,<br>2005a) |
| <i>Ipomoea neei</i> (SPRENG.) O'DONELL<br>Boquete, Panama (1995)                         | (Jenett-Siems et al., 1998, 2005a)          |
| <i>Ipomoea meyeri</i> (SPRENG.) G.DON<br>93 km to the west of Santiago,<br>Panama (1995) | (Tofern, 1999)                              |
| <i>Ipomoea alba</i> L.<br>Tonosi, Panama (1997)                                          | (Tofern, 1999)                              |
| <i>Ipomoea purpurea</i> L.<br>Antsirabe, Madagascar (1990)                               | (Henrici, 1996)                             |
| <i>Merremia quinquefolia</i> (L.) H.HALL.<br>Taboga Island, Panama (1997)                | (Jenett-Siems et al., 2005a)                |
